# Supplementary material for: Microwave-assisted synthesis of NaA nanozeolite from slag and performance of Ag-doped nanozeolite as an efficient material for determination of hydrogen peroxide
Source: Royal Society of Chemistry journal article supplement (doi:10.1039/c6ra06724g), 2016-01-01
Supplement: c6ra06724g1.pdf [file c6ra06724g1.pdf]

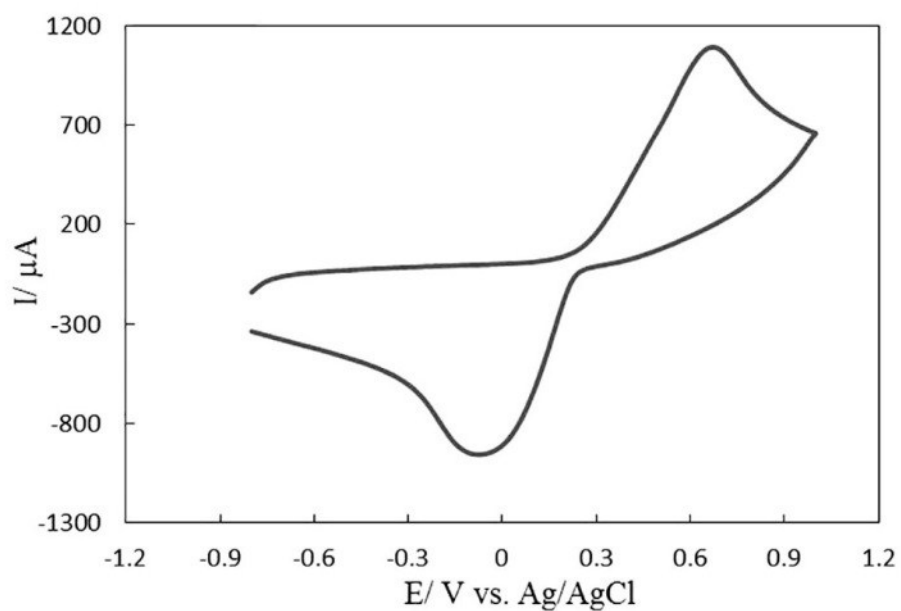

**Fig. S1.** CV of Ag particles on the modified Ag/ACPE in 0.1 M PBS (pH 7.0) at scan rate of 50 mV s<sup>-1</sup>.

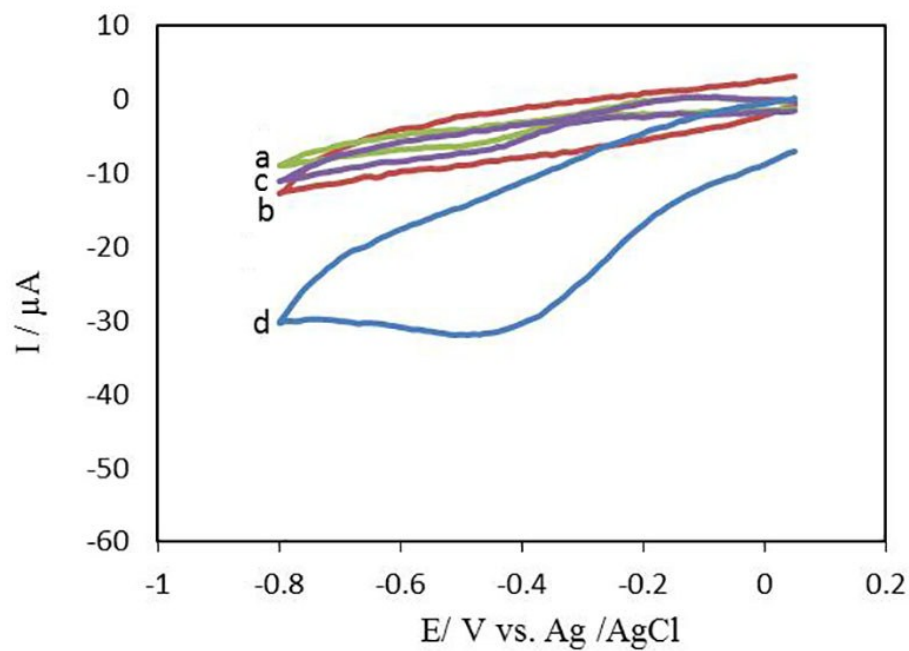

**Fig. S2.** Cyclic voltammograms of CPE (a and c) and Ag/ACPE (b and d) in the absent (a and c) and present (c and d) of 2 mM  $\text{H}_2\text{O}_2$  in the 0.1 M PBS (pH 7.0) at potential sweep scan rate of 50  $\text{mV s}^{-1}$ .
